# Supplementary material for: Ultrasonic-assisted self-assembly synthesis of highly dispersed β-MnO2 nano-branches interwoven with graphene flakes for catalytic oxidation of aromatic compounds
Source: Royal Society of Chemistry journal article supplement (doi:10.1039/c4ra16676k), 2015-01-01
Supplement: c4ra16676k1.pdf [file c4ra16676k1.pdf]

## Supplementary Materials

For

**Ultrasonic-Assisted Self-assembly Synthesis of Highly Dispersed  $\beta$ -MnO<sub>2</sub> Nanobranches  
Interwoven with Graphene Flakes for Catalytic Oxidation of Aromatic Compounds**

Jun Mei<sup>a</sup>, Long Zhang,<sup>a\*</sup>

<sup>a</sup>Jilin Provincial Engineering Laboratory for the Complex Utilization of Petro-  
Resources and Biomass, Changchun University of Technology, Changchun 130012, P

R China

---

**\*Corresponding authors. Tel: +86-431-8571-7216; Fax: +86-431-8571-6328**

**Address: Changchun University of Technology, Changchun 130012, P R China.**

**E-mail: [zhanglongzhl@163.com](mailto:zhanglongzhl@163.com) (L. Zhang).**

## Figures

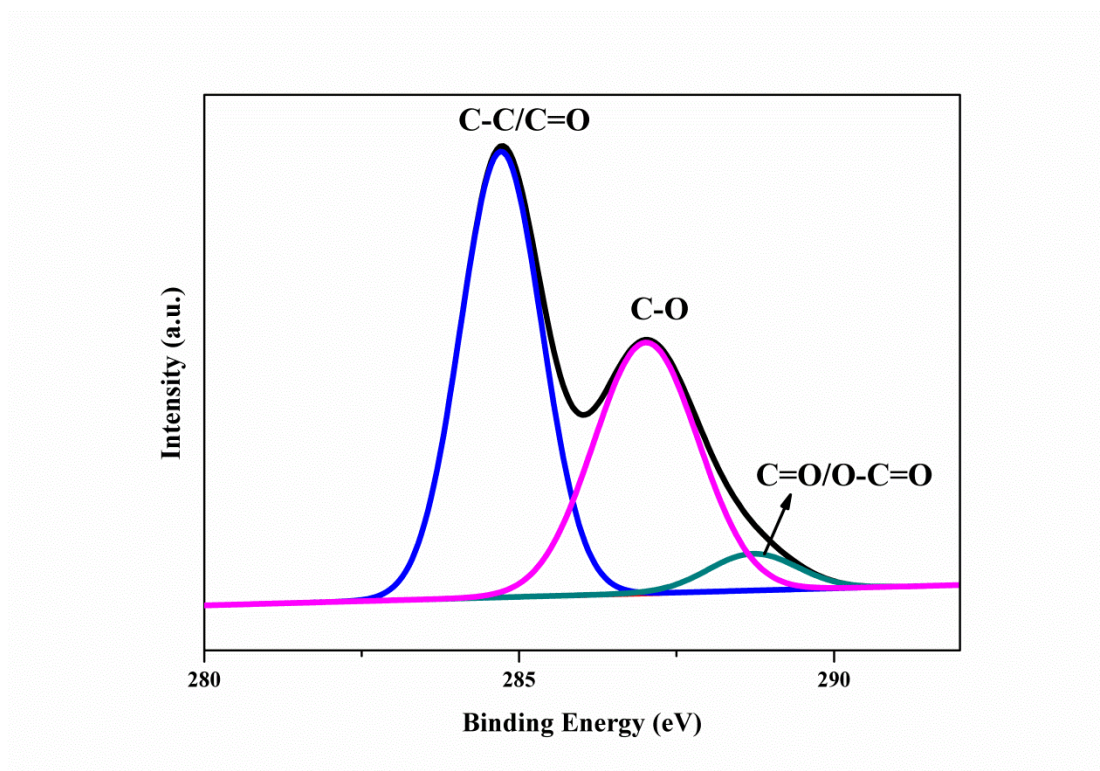

Figure S1. O1s spectra of the GO

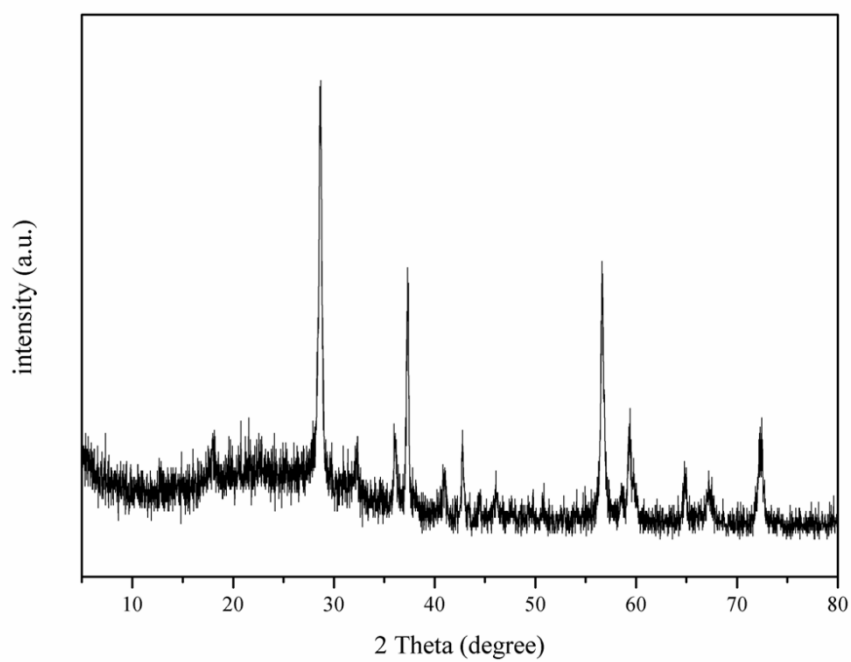

Figure S2. XRD patterns of the residual solid after 5 circles. Reaction conditions:  $[\text{MB}] = 25 \text{ mg}\cdot\text{L}^{-1}$ ,  $[\text{H}_2\text{O}_2] / [\text{MB}] = 20 \text{ mL/L}$ ,  $[\text{MnO}_2/\text{GO-94 composites}] = 0.5 \text{ g}\cdot\text{L}^{-1}$ ,  $T = 25^\circ\text{C}$ .

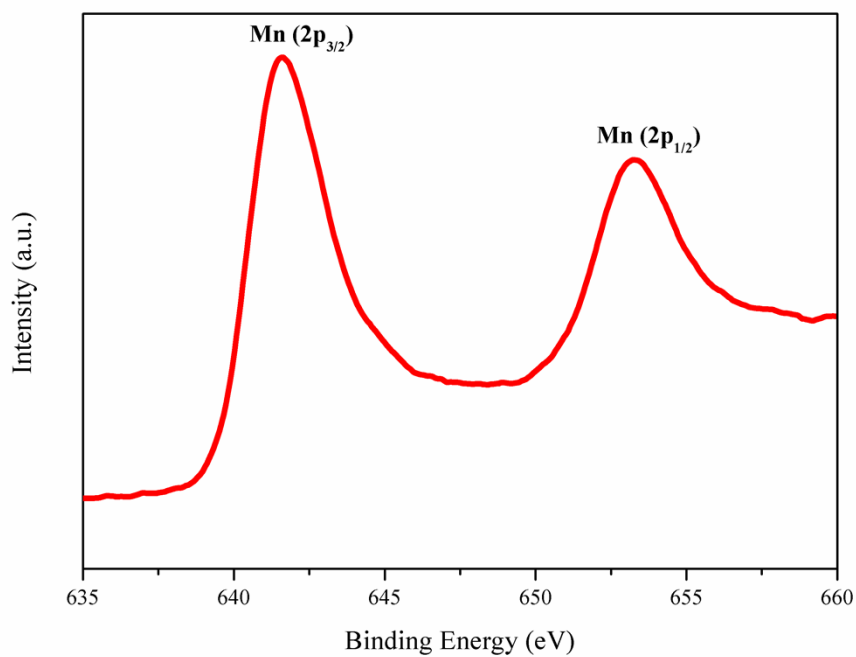

Figure S3. XPS spectra (Mn 2p) of the residual solid after 5 circles. Reaction conditions:  $[\text{MB}] = 25 \text{ mg}\cdot\text{L}^{-1}$ ,  $[\text{H}_2\text{O}_2] / [\text{MB}] = 20 \text{ mL/L}$ ,  $[\text{MnO}_2/\text{GO-94 composites}] = 0.5 \text{ g}\cdot\text{L}^{-1}$ ,  $T = 25^\circ\text{C}$ .

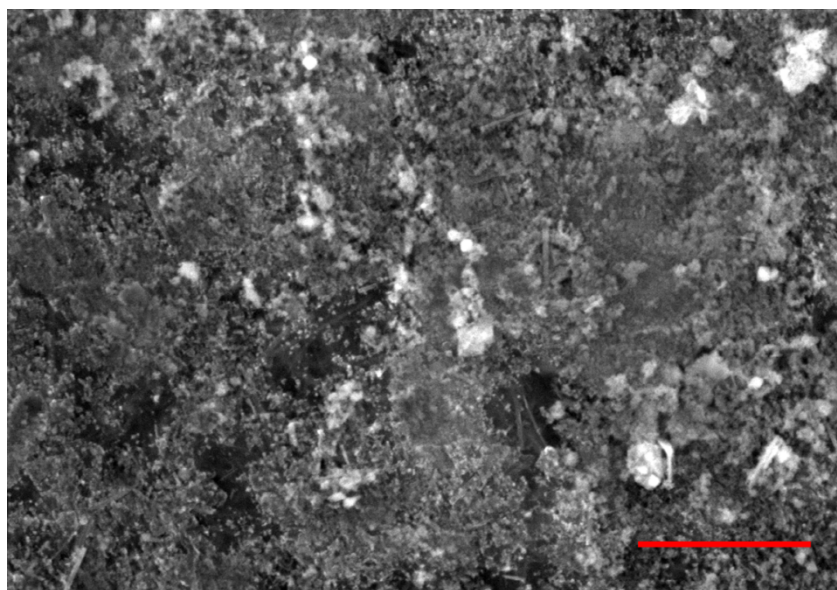

Figure S4. SEM images of the residual solid after 5 cycles. Reaction conditions: [MB] =  $25 \text{ mg}\cdot\text{L}^{-1}$ ,  $[\text{H}_2\text{O}_2] / [\text{MB}] = 20 \text{ mL/L}$ ,  $[\text{MnO}_2/\text{GO-94 composites}] = 0.5 \text{ g}\cdot\text{L}^{-1}$ ,  $T = 25^\circ\text{C}$ . Scale bars:  $5 \mu\text{m}$ .

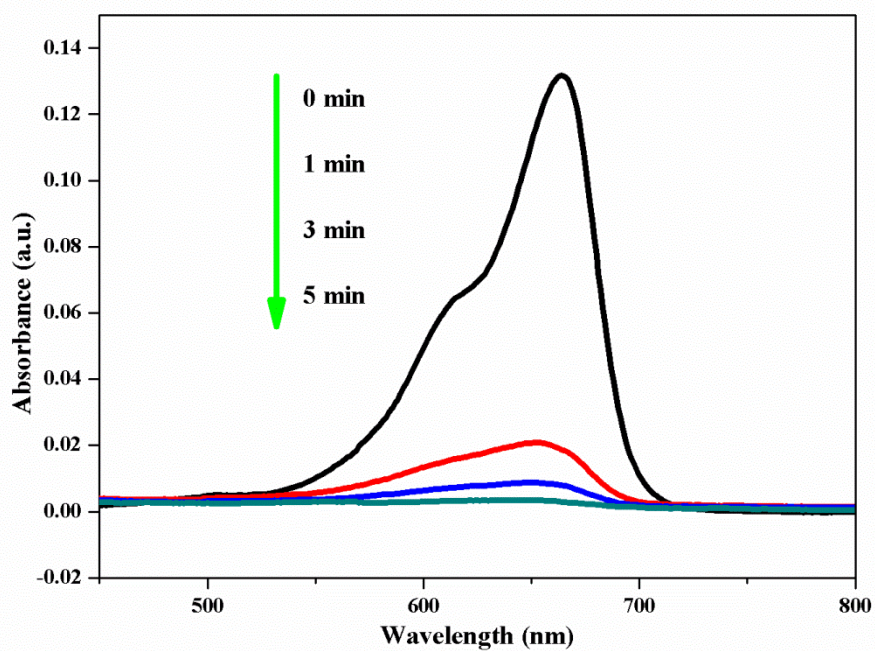

Figure S5. Absorption spectra of MB solution by  $\text{MnO}_2/\text{GO-94}$  catalytic system at different intervals. Reaction conditions:  $[\text{MB}] = 25 \text{ mg}\cdot\text{L}^{-1}$ ,  $[\text{H}_2\text{O}_2] / [\text{MB}] = 20 \text{ mL/L}$ ,  $[\text{Catalyst}] = 0.5 \text{ g}\cdot\text{L}^{-1}$ ,  $T = 25 \text{ }^\circ\text{C}$ .
